# Supplementary material
Source: HighWire-hosted journal article supplement (https://learnmem.cshlp.org/content/suppl/2022/12/23/30.1.12)
Supplement: Supplemental_Methods.docx [file Supplemental_Methods.docx]

**Supplemental Methods**

**Experimental Design Overview**

Following the screening/adaptation session, participants returned to the laboratory on two separate occasions for both a baseline and a testing session, counterbalanced across participants to mitigate order effects. During the experimental testing session, upon arrival, participants performed eight blocks of the Tower of Hanoi (ToH) and four blocks of the Control (CTL) task while being scanned in the magnetic resonance imaging (MRI) scanner. Each block was followed by a 20-second rest period. The order of the ToH and CTL tasks were counterbalanced across participants to mitigate order effects. This training session was then followed by either: a 90-minute daytime PSG recording (Nap condition), or, a 90-minute period of wakefulness (Wake condition). All participants were then returned to the scanner and completed four retest blocks of both the ToH and CTL tasks again while being scanned in the MRI. At testing session, the ToH and CTL tasks (starting at 10:00 AM) were performed while obtaining functional MRI (fMRI) blood oxygen level dependent (BOLD) images using a block design. In addition, we obtained 8-minute awake resting state fMRI images prior to and after the training and retest on the ToH and CTL tasks.

**Control Task**

An adapted version of the ToH task was intended specifically to control for (*i.e.*, subtract out) brain activations associated with motor execution of movements and the visual characteristics of the ToH for the fMRI analyses reported in Toor et al. (2022). The CTL task was identical to the ToH task in every way, except that each move was prompted from one pseudorandom location to another without violating the constraints of the task. Importantly, the CTL task required the same type of motor execution as the ToH (*e.g.*, speed and number of movements per block), but the movements did not follow the sequence of movements required to learn the underlying strategy (*i.e.*, recursive logic) needed to complete the ToH. Thus, learning the strategy and reaching the optimal solution was not possible in performing the CTL task. All sensorimotor, spatial, and visual aspects of the task were the same as the ToH. Each move was prompted by the appearance of a green dot above a peg at a possible random location to identify the disk to be moved, followed by a red dot above the destination peg to complete the move. Each block of the CTL task ended when a total of 31 randomly guided moves, corresponding to the minimum number of moves it takes to complete the 5-disk ToH task were completed.

**fMRI Recording Parameters**

All fMRI sequences (*i.e.*, resting state and task sessions) employed multislice T2-weighted fMRI images (TR = 2.16 sec; TE = 30 ms, FA = 90º, 40 transverse slices, 3 mm slice thickness, 10% inter-slice gap, FoV = 220 x 220 mm2, matrix size = 64 x 64 x 40, voxel size = 3.44 mm x 3.44 mm x 3 mm).

**Cognitive Aptitude Battery**

At the screening session, all participants completed the Cambridge Brain Sciences (CBS) test battery (Hampshire et al., 2012). The test battery takes around 30-45 minutes to complete. The CBS tests include classic twelve cognitive tests adapted for online testing that measure a broad range of cognitive abilities including reasoning, problem solving, planning, attention, and memory. A factor analysis based on scores from 44,600 participants (Hampshire et al., 2012), identified that Reasoning, Verbal and Short-Term Memory (STM) abilities explain distinct and non-overlapping (*i.e.*, orthogonal) domains of cognitive abilities along with their functional neuroanatomical substrates. The Reasoning factor is best described in terms of performance on five classical tests adapted for online testing from the cognitive and neuropsychological literature, including deductive reasoning (Cattell, 1940), spatial rotation (Silverman et al., 2000), feature match (Treisman & Gelade, 1980), spatial planning (Shallice, 1982), and polygons (Folstein et al., 1975). STM is best described in terms of four tests, including visuospatial working memory (Inoue & Matsuzawa, 2007), spatial span (Corsi, 1973), paired associates (Gould et al., 2006), and self-ordered search (Collins et al., 1998). Finally, verbal ability is best captured by performance on three tests, including verbal reasoning (Baddeley, 1968), color-word remapping (Stroop, 1935), and digit span (Wechsler, 1981). See Hampshire et al. (2012) for additional details.

**Baseline Session**

Following the screening session, participants attended the lab for one baseline session. Participants completed four blocks of the CTL task at 10:00 AM. Unlike the Testing session, the CTL session tasks were not conducted in the MRI. At 1:00 PM, after being prepared for polysomnographic recordings, participants in the Nap condition had their sleep recorded during a 90-minute daytime nap opportunity, whereas the participants in the Wake condition remained awake while reading, and laying in a supine position under dim ambient lighting. Both Nap and Wake conditions were continuously monitored via PSG recording (*n.b.*, in part to ensure the participants in the Wake conditions did not fall asleep). At 3:00 PM, more than 30 minutes after the end of the nap opportunity (to avoid sleep inertia effects), participants completed the retest session of the CTL task comprising four blocks. The Stanford Sleepiness Scale (Maclean et al., 1992), and the Psychomotor Vigilance Test (Dinges & Powell, 1985) were administered prior to and following both CTL sessions to obtain subjective and objective measures of sleepiness across the baseline protocol.

**References**

Baddeley, A. D. (1968). A 3 min reasoning test based on grammatical transformation. *Psychonomic Science*, *10*(10), 341–342.

Cattell, R. B. (1940). A culture-free intelligence test. *Journal of Educational Psychology*, *31*(3), 161–179. https://doi.org/10.1037/h0059043

Collins, P., Roberts, A. C., Dias, R., Everitt, B. J., & Robbins, T. W. (1998). Perseveration and Strategy in a Novel Spatial Self-Ordered Sequencing Task for Nonhuman Primates: Effects of Excitotoxic Lesions and Dopamine Depletions of the Prefrontal Cortex. *Journal of Cognitive Neuroscience*, *10*(3), 332–354. https://doi.org/10.1162/089892998562771

Corsi, P. (1973). Human memory and the medial temporal region of the brain. *Dissertation Abstracts International*, *34*(2-B), 891.

Dinges, D. F., & Powell, J. W. (1985). Microcomputer analyses of performance on a sustained operations. *Behaviour Research Methods, Instruments, & Computers*, *17*(6), 652–655.

Folstein, M. F., Folstein, S. E., & McHugh, P. R. (1975). “Mini-mental state”. A practical method for grading the cognitive state of patients for the clinician. *Journal of Psychiatric Research*, *12*(3), 189–198. https://doi.org/10.1016/0022-3956(75)90026-6

Gould, R. L., Brown, R. G., Owen, A. M., Bullmore, E. T., & Howard, R. J. (2006). Task-induced deactivations during successful paired associates learning: An effect of age but not Alzheimer’s disease. *NeuroImage*, *31*(2), 818–831.

Hampshire, A., Highfield, R. R., Parkin, B. L., & Owen, A. M. (2012). Fractionating human intelligence. *Neuron*, *76*(6), 1225–1237. https://doi.org/10.1016/j.neuron.2012.06.022

Inoue, S., & Matsuzawa, T. (2007). Working memory of numerals in chimpanzees. *Current Biology*, *17*(23), R1004—-R1005.

Maclean, A. W., Fekken, G. C., Saskin, P., & Knowles, J. B. (1992). Psychometric evaluation of the Stanford Sleepiness Scale. *Journal of Sleep Research*, *1*(1), 35–39. https://doi.org/10.1111/j.1365-2869.1992.tb00006.x

Shallice, T. (1982). Specific impairments of planning. *Philosophical Transactions of the Royal Society of London*, 199–209.

Silverman, I., Choi, J., & Mackewn, A. (2000). Evolved mechanisms underlying wayfinding: Further studies on the hunter-gatherer theory of spatial sex differences. *Evolution and Human Behavior*, *21*(3), 201–213.

Stroop, J. R. (1935). Studies of interference in serial verbal reactions. *Journal of Experimental Psychology*, *18*(6), 643–662. https://doi.org/10.1037/h0054651

Toor, B., van den Berg, N., Fang, Z., Pozzobon, A., Ray, L. B., & Fogel, S. (2022). Age-related differences in problem-solving skills: Reduced benefit of sleep for memory trace consolidation. *Neurobiology of Aging*, *116*, 55–66. https://doi.org/10.1016/j.neurobiolaging.2022.04.011

Treisman, A. M., & Gelade, G. (1980). A feature-integration theory of attention. *Cognitive Psychology*, *12*(1), 97–136.

Wechsler, D. A. (1981). Wechsler Adult Intelligence Scale–Revised. *New York: Psychological Corporation.*
