# Supplementary material
Source: HighWire-hosted journal article supplement (https://learnmem.cshlp.org/content/suppl/2022/12/23/30.1.12)
Supplement: Supplemental_Table_S1.docx [file Supplemental_Table_S1.docx]

**Supplemental Results**

| **Supplemental Table 1:** Bivariatecorrelations between behavioral performance improvements on the ToH (accuracy, speed) and sleep oscillations (fast spindles, slow spindles, slow waves) during NREM sleep in young and older adults. | | | | |
| --- | --- | --- | --- | --- |
| **YOUNG ADULTS** | | | | |
|  | **Accuracy** | | **Speed** | |
|  | **r** | ***p*** | **r** | ***p*** |
| Slow Spindle Density | 0.25 | 0.295 | 0.12 | 0.623 |
| Slow Spindle Size | -0.24 | 0.310 | 0.39 | 0.087 |
|  |  |  |  |  |
| Fast Spindle Density | -0.15 | 0.524 | -0.32 | 0.167 |
| Fast Spindle Size | 0.09 | 0.697 | 0.31 | 0.181 |
|  |  |  |  |  |
| Slow Wave Density | 0.26 | 0.275 | 0.32 | 0.169 |
| Slow Wave Size | 0.26 | 0.266 | 0.32 | 0.165 |
|  | | | | |
| **OLDER ADULTS** | | | | |
| Slow Spindle Density | 0.02 | 0.959 | 0.01 | 0.982 |
| Slow Spindle Size | 0.21 | 0.445 | -0.24 | 0.388 |
|  |  |  |  |  |
| Fast Spindle Density | 0.12 | 0.669 | -0.04 | 0.879 |
| Fast Spindle Size | 0.09 | 0.760 | -0.33 | 0.227 |
|  |  |  |  |  |
| Slow Wave Density | 0.28 | 0.351 | 0.08 | 0.793 |
| Slow Wave Size | -0.52 | 0.068 | 0.27 | 0.378 |
